# Supplementary material for: Erythrocytes lacking the Langereis blood group protein ABCB6 are resistant to the malaria parasite Plasmodium falciparum
Source: PubMed Central journal article supplement (PMC6123700; doi:10.1038/s42003-018-0046-2), 2018-05-03
Supplement: 42003_2018_46_MOESM1_ESM.pdf [file 42003_2018_46_MOESM1_ESM.pdf]

Supplementary Table 1: Proteomics data from five Lan null and five Lan-positive erythrocyte samples filtered by "plasma Membrane" GOCC annotation and > 1 peptide quantification

| Uniprot  | Description                                                     | Gene Symbol | Peptides | Ratio lan-null/Lan+ | T-test B-H corrected | Lan-null_1 S:N | Lan-null_2 S:N | Lan-null_3 S:N | Lan-null_4 S:N | Lan-null_5 S:N | Lan+_1 S:N | Lan+_2 S:N | Lan+_3 S:N | Lan+_4 S:N | Lan+_5 S:N | Lan-ve sum S:N | Control sum S:N |
|----------|-----------------------------------------------------------------|-------------|----------|---------------------|----------------------|----------------|----------------|----------------|----------------|----------------|------------|------------|------------|------------|------------|----------------|-----------------|
| Q9NP58   | ATP-binding cassette sub-family B member 6, mitochondrial ABCB6 | ABCB6       | 15       | 0.07                | 0.00006              | 206            | 149            | 253            | 170            | 175            | 2303       | 2803       | 2354       | 3129       | 2581       | 952            | 13170           |
| Q9UIU6-3 | Isoform 3 of Drebrin-like protein                               | DNBL        | 4        | 0.29                | 0.00019              | 262            | 239            | 232            | 320            | 364            | 1133       | 864        | 10015      | 1065       | 883        | 1417           | 4960            |
| P31641   | Sodium- and chloride-dependent taurine transport                | SLC6A6      | 2        | 0.35                | 0.10395              | 174            | 172            | 176            | 483            | 453            | 1117       | 1359       | 747        | 654        | 275        | 1458           | 4152            |
| P00749   | Urokinase-type plasminogen activator                            | PLAU        | 6        | 0.37                | 0.13908              | 19             | 272            | 305            | 436            | 489            | 980        | 959        | 1206       | 977        | 14         | 1522           | 4136            |
| Q6UVK1   | Chondroitin sulfate proteoglycan 4                              | CSPG4       | 8        | 0.39                | 0.09243              | 270            | 487            | 494            | 532            | 484            | 1654       | 1557       | 1244       | 1038       | 357        | 2268           | 5850            |
| Q9H2H9   | Sodium-coupled neutral amino acid transporter 1                 | SLC38A1     | 3        | 0.39                | 0.09243              | 42             | 41             | 47             | 117            | 104            | 248        | 234        | 176        | 176        | 67         | 351            | 900             |
| Q9UGT4   | Sushi domain-containing protein 2                               | SUSD2       | 7        | 0.40                | 0.38253              | 1129           | 63             | 86             | 90             | 66             | 857        | 968        | 99         | 96         | 1597       | 1433           | 3617            |
| P05070-4 | Isoform 4 of Dynamin-2                                          | DNM2        | 2        | 0.42                | 0.00038              | 88             | 91             | 59             | 55             | 51             | 157        | 157        | 171        | 172        | 166        | 344            | 822             |
| Q96QD8   | Sodium-coupled neutral amino acid transporter 2                 | SLC38A2     | 2        | 0.43                | 0.15029              | 24             | 26             | 30             | 68             | 67             | 138        | 154        | 95         | 83         | 25         | 215            | 495             |
| P11413-2 | Isoform Long of Glucose-6-phosphate 1-dehydrogenase             | G6PD        | 5        | 0.46                | 0.00587              | 276            | 250            | 270            | 333            | 418            | 871        | 626        | 647        | 659        | 598        | 1549           | 3402            |
| O43194   | G-protein coupled receptor 39                                   | GRP39       | 2        | 0.46                | 0.10395              | 92             | 192            | 220            | 344            | 350            | 661        | 650        | 591        | 568        | 148        | 1198           | 2617            |
| P21589   | 5'-nucleotidase                                                 | NT5E        | 6        | 0.46                | 0.15092              | 273            | 600            | 583            | 1185           | 1024           | 2068       | 2309       | 1560       | 1731       | 306        | 3664           | 7974            |
| P30825   | High affinity cationic amino acid transporter 1                 | SLC7A1      | 5        | 0.48                | 0.11166              | 419            | 650            | 558            | 1087           | 1032           | 1687       | 1959       | 1873       | 1826       | 423        | 3747           | 7769            |
| P46459   | Vesicle-fusing ATPase                                           | NSF         | 5        | 0.50                | 0.01793              | 459            | 429            | 297            | 225            | 192            | 628        | 661        | 789        | 605        | 520        | 1602           | 3233            |
| Q01650   | Large neutral amino acids transporter small subunit             | SLC7A5      | 2        | 0.50                | 0.00298              | 82             | 61             | 68             | 81             | 86             | 176        | 158        | 119        | 159        | 149        | 378            | 760             |
| Q9UNN8   | Endothelial protein C receptor                                  | PROCRC      | 3        | 0.50                | 0.03686              | 186            | 248            | 279            | 348            | 280            | 621        | 651        | 564        | 550        | 308        | 1342           | 2695            |
| P43121   | Cell surface glycoprotein MUC18                                 | MCAM        | 21       | 0.50                | 0.37706              | 277            | 2576           | 2763           | 1473           | 1456           | 1898       | 1928       | 6776       | 6128       | 328        | 8545           | 17058           |
| P08237-3 | Isoform 3 of G-protein phosphofruktokinase, muscle type         | PFKM        | 7        | 0.50                | 0.10668              | 705            | 719            | 576            | 308            | 600            | 937        | 1047       | 1968       | 983        | 835        | 2907           | 5771            |
| Q9Y653   | G-protein coupled receptor 56                                   | GPCR56      | 3        | 0.51                | 0.29428              | 78             | 105            | 124            | 143            | 144            | 414        | 422        | 139        | 100        | 94         | 593            | 1168            |
| P56199   | Integrin alpha-1                                                | ITGA1       | 3        | 0.51                | 0.11166              | 93             | 165            | 180            | 300            | 277            | 482        | 462        | 491        | 426        | 134        | 1015           | 1996            |
| P37840   | Alpha-synuclein                                                 | SNCA        | 6        | 0.51                | 0.01793              | 422            | 514            | 380            | 594            | 465            | 1211       | 889        | 751        | 781        | 1010       | 2375           | 4642            |
| P11279   | Lysosome-associated membrane glycoprotein 1                     | LAMP1       | 4        | 0.51                | 0.06038              | 195            | 201            | 138            | 276            | 418            | 505        | 301        | 587        | 512        | 495        | 1229           | 2400            |
| P50281   | Matrix metalloproteinase-14                                     | MMP14       | 4        | 0.52                | 0.15565              | 144            | 401            | 440            | 434            | 396            | 783        | 890        | 893        | 787        | 138        | 1815           | 3490            |
| Q65893-2 | Isoform 2 of Gamma-glutamyltransferase STEAP3                   | STEAP3      | 4        | 0.52                | 0.09243              | 474            | 404            | 440            | 524            | 541            | 1144       | 1145       | 960        | 897        | 393        | 2383           | 4540            |
| P36269-3 | Isoform 3 of Metallo-glutamyltransferase 5                      | GT5         | 3        | 0.52                | 0.45380              | 87             | 326            | 339            | 277            | 288            | 950        | 1122       | 172        | 141        | 122        | 1316           | 2508            |
| Q9UPY5   | Cystine/glutamate transporter                                   | SLC7A11     | 2        | 0.53                | 0.31728              | 303            | 284            | 318            | 1956           | 2225           | 2642       | 3030       | 1981       | 1690       | 314        | 5087           | 9658            |
| Q03405   | Urokinase plasminogen activator surface receptor                | PLAUR       | 4        | 0.53                | 0.15618              | 51             | 86             | 84             | 122            | 133            | 184        | 219        | 237        | 220        | 41         | 476            | 899             |
| Q00610   | Clathrin heavy chain 1                                          | CLTC        | 3        | 0.53                | 0.05861              | 151            | 54             | 68             | 73             | 107            | 166        | 142        | 195        | 137        | 209        | 453            | 848             |
| P13639   | Elongation factor 2                                             | EF2         | 2        | 0.54                | 0.05581              | 118            | 95             | 66             | 55             | 89             | 119        | 154        | 207        | 124        | 184        | 424            | 788             |
| P00533   | Epidermal growth factor receptor                                | EGFR        | 33       | 0.54                | 0.05838              | 5126           | 3179           | 3618           | 6664           | 6761           | 11319      | 11280      | 10065      | 7961       | 6402       | 25348          | 47027           |
| P01130   | Low-density lipoprotein receptor                                | LDLR        | 4        | 0.55                | 0.23459              | 107            | 557            | 599            | 653            | 663            | 912        | 949        | 1442       | 1261       | 153        | 2579           | 4717            |
| P17813   | Endoglin                                                        | ENG         | 11       | 0.55                | 0.10395              | 804            | 707            | 535            | 1367           | 1062           | 1550       | 1489       | 2177       | 1980       | 899        | 4475           | 8095            |
| P30530   | Tyrosine-protein kinase receptor UFO                            | AXL         | 4        | 0.55                | 0.43403              | 54             | 285            | 330            | 532            | 554            | 1239       | 1163       | 362        | 322        | 84         | 1754           | 3171            |
| Q92692-2 | Isoform Alpha of Poliovirus receptor-related protein            | PVR2        | 3        | 0.55                | 0.23448              | 50             | 197            | 208            | 211            | 214            | 300        | 314        | 506        | 403        | 61         | 879            | 1585            |
| P29317   | Ephrin type-A receptor 2                                        | EPHA2       | 18       | 0.56                | 0.23448              | 684            | 1560           | 1868           | 2083           | 2287           | 3850       | 3784       | 4709       | 1909       | 920        | 8481           | 15172           |
| Q96AP7   | Endothelial cell-selective adhesion molecule                    | ESAM        | 2        | 0.56                | 0.25332              | 40             | 119            | 133            | 146            | 139            | 326        | 310        | 172        | 153        | 61         | 576            | 1022            |
| Q04656-3 | Isoform 3 of Copper-transporting ATPase 1                       | ATP7A       | 20       | 0.57                | 0.05962              | 2877           | 2495           | 2115           | 1317           | 1274           | 2698       | 3680       | 4528       | 3328       | 3429       | 10077          | 17683           |
| P05556   | Integrin beta-1                                                 | ITGB1       | 46       | 0.57                | 0.16782              | 1413           | 3118           | 3337           | 4593           | 4287           | 7853       | 7603       | 6770       | 5136       | 2023       | 16749          | 29385           |
| Q14542   | Equilibrative nucleoside transporter 2                          | SLC29A2     | 2        | 0.57                | 0.10395              | 38             | 61             | 54             | 45             | 41             | 90         | 103        | 61         | 116        | 49         | 239            | 420             |
| Q02786   | Transferrin receptor protein 1                                  | TFRC        | 31       | 0.57                | 0.04598              | 3732           | 1989           | 2295           | 2499           | 2441           | 5380       | 5380       | 4659       | 3345       | 3879       | 12956          | 22643           |
| Q6YHK3   | CD109 antigen                                                   | CD109       | 3        | 0.57                | 0.62087              | 405            | 28             | 24             | 28             | 23             | 50         | 61         | 154        | 169        | 452        | 508            | 886             |
| Q15043   | Zinc transporter ZIP14                                          | SLC39A14    | 2        | 0.57                | 0.21842              | 109            | 120            | 125            | 332            | 299            | 505        | 455        | 310        | 289        | 158        | 984            | 1716            |
| P08195-4 | Isoform 4 of F2c cell-surface antigen heavy chain               | SLC3A2      | 36       | 0.58                | 0.00778              | 3253           | 2598           | 2714           | 3859           | 3412           | 6122       | 6200       | 4782       | 5578       | 4820       | 15836          | 27501           |
| O15431   | High affinity copper uptake protein 1                           | SLC31A1     | 3        | 0.58                | 0.00298              | 112            | 126            | 150            | 177            | 161            | 240        | 272        | 259        | 260        | 224        | 725            | 1255            |
| Q15758   | Neutral amino acid transporter B(0)                             | SLC1A5      | 9        | 0.58                | 0.16633              | 258            | 456            | 483            | 781            | 785            | 974        | 1033       | 1298       | 1090       | 359        | 2763           | 4755            |
| Q9NPQ8   | Synembryon-A                                                    | RIC8A       | 3        | 0.59                | 0.10395              | 243            | 202            | 193            | 110            | 197            | 313        | 286        | 465        | 339        | 212        | 945            | 1615            |
| Q09666   | Neuroblast differentiation-associated protein AHN1              | AHNAC       | 2        | 0.59                | 0.16343              | 47             | 38             | 45             | 76             | 84             | 133        | 142        | 84         | 68         | 66         | 290            | 492             |
| P2859    | Neogenin                                                        | NEO1        | 2        | 0.59                | 0.10395              | 197            | 109            | 103            | 265            | 266            | 417        | 356        | 264        | 254        | 302        | 941            | 1593            |
| P78536   | Disintegrin and metalloproteinase domain-containing ADAM17      | ADAM17      | 6        | 0.59                | 0.09719              | 221            | 266            | 275            | 274            | 259            | 565        | 575        | 421        | 362        | 265        | 1295           | 2188            |
| P26006-1 | Isoform 2 of Integrin alpha-3                                   | ITGA3       | 28       | 0.59                | 0.29428              | 999            | 2169           | 2368           | 3275           | 3273           | 6338       | 6459       | 3047       | 3000       | 1166       | 12085          | 20369           |
| P09543   | 2',3'-cyclic-nucleotide 3'-phosphodiesterase                    | CNP         | 14       | 0.59                | 0.03112              | 621            | 741            | 547            | 306            | 505            | 936        | 904        | 1042       | 950        | 753        | 2720           | 4584            |
| Q04792   | Heat shock protein beta-1                                       | HSPB1       | 2        | 0.60                | 0.18583              | 44             | 68             | 38             | 34             | 75             | 73         | 95         | 64         | 59         | 144        | 259            | 434             |
| P28827-2 | Isoform 2 of Receptor-type tyrosine-protein phosphatase PTPRM   | PTPRM       | 8        | 0.60                | 0.26206              | 189            | 699            | 822            | 877            | 847            | 1804       | 1597       | 1000       | 818        | 466        | 3435           | 5685            |
| P34910   | Protein EVI2B                                                   | EVI2B       | 7        | 0.61                | 0.46577              | 110            | 242            | 245            | 944            | 920            | 1407       | 1355       | 723        | 461        | 103        | 2461           | 4050            |
| O60266   | Adenylate cyclase type 3                                        | ADCY3       | 2        | 0.61                | 0.12247              | 132            | 123            | 123            | 202            | 197            | 353        | 338        | 211        | 195        | 183        | 779            | 1281            |
| P30480   | HLA class I histocompatibility antigen, B-2 alpha of HLA-B      | HLAG        | 2        | 0.61                | 0.33482              | 60             | 703            | 887            | 789            | 848            | 1195       | 1593       | 1399       | 1131       | 64         | 3286           | 5382            |
| Q14126   | Desmoglein-2                                                    | DSG2        | 2        | 0.61                | 0.13624              | 48             | 74             | 103            | 121            | 104            | 142        | 138        | 185        | 190        | 78         | 450            | 733             |
| O15031   | Plexin-B2                                                       | PLXB2       | 11       | 0.61                | 0.11892              | 680            | 626            | 691            | 972            | 969            | 1804       | 1668       | 1043       | 985        | 930        | 3949           | 6430            |
| Q13740   | CD166 antigen                                                   | ALCAM       | 26       | 0.62                | 0.25332              | 1654           | 2753           | 3177           | 4283           | 3987           | 7334       | 7970       | 4443       | 3628       | 2314       | 15865          | 25691           |
| Q14118   | Dystroglycan                                                    | DAG1        | 10       | 0.63                | 0.15504              | 922            | 980            | 966            | 1253           | 1299           | 2410       | 2354       | 1422       | 1142       | 1527       | 5420           | 8586            |
| P17301   | Integrin alpha-2                                                | ITGA2       | 29       | 0.63                | 0.23581              | 1068           | 3406           | 3557           | 3566           | 3661           | 5507       | 5334       | 6241       | 5661       | 1323       | 15257          | 24065           |
| P16144   | Integrin beta-4                                                 | ITGB4       | 18       | 0.63                | 0.32335              | 2489           | 2363           | 2789           | 2133           | 2398           | 6395       | 5959       | 1816       | 1728       | 3294       | 12171          | 19192           |
| Q00220   | Tumor necrosis factor receptor superfamily member 10A           | TNFRSF10A   | 2        | 0.64                | 0.35676              | 40             | 337            | 357            | 410            | 449            | 595        | 584        | 685        | 609        | 34         | 1594           | 2506            |
| P04626   | Receptor tyrosine-protein kinase erbB-2                         | ERBB2       | 14       | 0.64                | 0.69674              | 4385           | 308            | 313            | 703            | 697            | 1648       | 2144       | 320        | 311        | 5613       | 6406           | 10036           |
| Q8NG11   | Tetraspanin-14                                                  | TSPAN14     | 3        | 0.64                | 0.23304              | 68             | 103            | 112            | 171            | 170            | 261        | 273        | 180        | 169        | 92         | 625            | 975             |
| P32004-2 | Isoform 2 of Neural cell adhesion molecule L1                   | L1CAM       | 12       | 0.64                | 0.11892              | 622            | 905            | 954            | 1199           | 1158           | 1920       | 1657       | 1710       | 1436       | 809        | 4839           | 7532            |
| Q14672   | Disintegrin and metalloproteinase domain-containing ADAM10      | ADAM10      | 4        | 0.64                | 0.10395              | 284            | 304            | 306            | 424            | 421            | 656        | 718        | 505        | 459        | 367        | 1738           | 2704            |
| P23470   | Receptor-type tyrosine-protein phosphatase gamma PTPRG          | PTPRG       | 4        | 0.64                | 0.29853              | 255            | 449            | 455            | 629            | 690            | 1163       | 1184       | 564        | 570        | 371        | 2478           | 3852            |
| P07355-2 | Isoform 2 of Annexin A2                                         | ANXA2       | 8        | 0.65                | 0.17335              | 600            | 463            | 420            | 476            | 513            | 678        | 634        | 1259       | 712        | 537        | 2473           | 3820            |
| P63010-2 | Isoform 2 of AP-2 complex subunit beta                          | AP2B1       | 2        | 0.65                | 0.01793              | 159            | 118            | 159            | 160            | 187            | 272        | 221        | 208        | 233        | 267        | 784            | 1201            |
| Q8WTV0   | Scavenger receptor class B member 1                             | SCARB1      | 3        | 0.66                | 0.49200              | 1698           | 356            | 359            | 483            | 513            | 678        | 797        | 965        | 674        | 2085       | 3407           | 5199            |
| P09758   | Tumor-associated calcium signal transducer 2                    | TACSTD2     | 5        | 0.66                | 0.10395              | 269            | 200            | 214            | 172            | 159            | 230        | 235        | 390        | 348        | 342        | 1014           | 1545            |
| P21333   | Filamin-A                                                       | FLNA        | 4        | 0.66                | 0.02153              | 206            | 135            | 133            | 185            | 187            | 247        | 236        | 289        | 274        | 233        | 845            | 1278            |
| Q9HVS8   | CUB domain-containing protein 1                                 | CDCP1       | 7        | 0.67                | 0.31060              | 272            | 849            | 937            | 8              |                |            |            |            |            |            |                |                 |

|          |                                                            |          |     |      |         |       |       |       |       |       |       |       |       |       |       |        |        |
|----------|------------------------------------------------------------|----------|-----|------|---------|-------|-------|-------|-------|-------|-------|-------|-------|-------|-------|--------|--------|
| Q13530   | Serine incorporator 3                                      | SERINC3  | 4   | 0.80 | 0.28674 | 155   | 318   | 277   | 163   | 262   | 327   | 316   | 238   | 227   | 302   | 1125   | 1410   |
| Q4KMQ2-2 | Isoform 2 of Anoctamin-6                                   | ANO6     | 4   | 0.80 | 0.10395 | 352   | 338   | 335   | 418   | 313   | 443   | 517   | 278   | 390   | 368   | 1755   | 2196   |
| Q9Y6N7-2 | Isoform 2 of Roundabout homolog 1                          | ROBO1    | 3   | 0.80 | 0.29428 | 152   | 138   | 183   | 236   | 236   | 294   | 275   | 213   | 226   | 167   | 944    | 1175   |
| P15144   | Aminopeptidase N                                           | ANPEP    | 9   | 0.80 | 0.91393 | 4231  | 129   | 120   | 174   | 181   | 119   | 148   | 174   | 224   | 5353  | 4835   | 6018   |
| P38606   | V-type proton ATPase catalytic subunit A                   | ATP6V1A  | 2   | 0.81 | 0.19959 | 230   | 244   | 230   | 137   | 236   | 205   | 278   | 259   | 390   | 280   | 1077   | 1331   |
| P48960   | CD97 antigen                                               | CD97     | 14  | 0.81 | 0.64527 | 425   | 2928  | 3283  | 2815  | 2981  | 3160  | 3393  | 4516  | 3826  | 459   | 12431  | 15354  |
| P49327   | Fatty acid synthase                                        | FASN     | 4   | 0.81 | 0.25655 | 271   | 182   | 200   | 148   | 232   | 246   | 292   | 201   | 226   | 307   | 1033   | 1272   |
| Q8IUW5   | RELT-like protein 1                                        | RELL1    | 7   | 0.81 | 0.37706 | 1692  | 2496  | 1620  | 910   | 1053  | 1736  | 1867  | 1983  | 2006  | 1969  | 7770   | 9561   |
| P04406   | Glyceraldehyde-3-phosphate dehydrogenase                   | GAPDH    | 17  | 0.83 | 0.25786 | 1258  | 1902  | 1714  | 1123  | 1593  | 1494  | 1672  | 2141  | 1718  | 2294  | 7689   | 9319   |
| P01892   | HLA class I histocompatibility antigen, A-2 alpha chain    | HLA-A    | 4   | 0.83 | 0.65614 | 63    | 345   | 366   | 302   | 303   | 442   | 418   | 403   | 337   | 66    | 1379   | 1666   |
| P11142   | Heat shock cognate 71 kDa protein                          | HSPA8    | 18  | 0.83 | 0.10395 | 1363  | 1281  | 1215  | 1241  | 1409  | 1648  | 1571  | 1368  | 1781  | 1861  | 6509   | 7827   |
| P01903   | HLA class II histocompatibility antigen, DR alpha chain    | HLA-DRA  | 2   | 0.84 | 0.77842 | 56    | 86    | 89    | 30    | 41    | 42    | 25    | 142   | 122   | 30    | 302    | 362    |
| P54760   | Ephrin type-B receptor 4                                   | EPHB4    | 7   | 0.84 | 0.57644 | 370   | 580   | 347   | 325   | 710   | 691   | 330   | 421   | 648   | 672   | 2333   | 2762   |
| P18433   | Receptor-type tyrosine-protein phosphatase alpha           | PTPRA    | 24  | 0.85 | 0.23448 | 1889  | 2567  | 2202  | 2048  | 1601  | 2524  | 2332  | 2197  | 2209  | 2917  | 10307  | 12179  |
| Q9H7F0   | Probable cation-transporting ATPase 13A3                   | ATP13A3  | 4   | 0.85 | 0.29428 | 241   | 176   | 199   | 184   | 183   | 251   | 268   | 268   | 176   | 192   | 984    | 1155   |
| P53794   | Sodium/myo-inositol cotransporter                          | SLC5A3   | 2   | 0.86 | 0.43403 | 121   | 75    | 74    | 67    | 76    | 102   | 107   | 86    | 107   | 75    | 413    | 478    |
| Q9Y6M7   | Sodium bicarbonate cotransporter 3                         | SLC4A7   | 3   | 0.87 | 0.75419 | 97    | 325   | 335   | 479   | 503   | 610   | 504   | 403   | 394   | 95    | 1739   | 2007   |
| P35579   | Myosin-9                                                   | MHY9     | 6   | 0.87 | 0.60949 | 428   | 216   | 225   | 222   | 209   | 292   | 267   | 273   | 241   | 426   | 1300   | 1499   |
| P13746-2 | Isoform 2 of HLA class I histocompatibility antigen, HLA-A | HLA-A    | 3   | 0.88 | 0.34915 | 11530 | 13523 | 12328 | 15549 | 13689 | 12476 | 12689 | 17911 | 18141 | 14751 | 66619  | 75968  |
| Q9UHW9   | Solute carrier family 12 member 6                          | SLC12A6  | 15  | 0.88 | 0.73534 | 3059  | 2430  | 1438  | 2085  | 1457  | 1379  | 2365  | 351   | 287   | 166   | 1217   | 1616   |
| P15151   | Poliovirus receptor                                        | PVR      | 7   | 0.89 | 0.46112 | 638   | 699   | 885   | 652   | 612   | 739   | 722   | 1039  | 801   | 627   | 3486   | 3927   |
| Q9NQ25   | SLAM family member 7                                       | SLAMF7   | 2   | 0.89 | 0.82591 | 20    | 347   | 382   | 422   | 392   | 491   | 488   | 412   | 342   | 26    | 1562   | 1760   |
| P01024   | Complement C3                                              | C3       | 16  | 0.89 | 0.82591 | 1647  | 1125  | 2365  | 1513  | 2515  | 4330  | 1082  | 1244  | 1431  | 2210  | 9165   | 10296  |
| Q15439   | Multidrug resistance-associated protein 4                  | ABCC4    | 55  | 0.90 | 0.51242 | 9475  | 9500  | 7018  | 6797  | 6181  | 6605  | 9823  | 7801  | 10332 | 8883  | 38972  | 43443  |
| P54578   | Ubiquitin carboxyl-terminal hydrolase 14                   | USP14    | 4   | 0.90 | 0.23581 | 385   | 332   | 434   | 369   | 420   | 411   | 451   | 408   | 486   | 397   | 1940   | 2153   |
| Q8T2Z2-5 | Isoform 5 of CD99 antigen-like protein 2                   | CD99L2   | 7   | 0.90 | 0.83381 | 98    | 594   | 592   | 847   | 846   | 977   | 907   | 679   | 573   | 166   | 2977   | 3302   |
| P53985   | Monocarboxylate transporter 1                              | SLC16A1  | 9   | 0.90 | 0.83381 | 675   | 1307  | 440   | 983   | 303   | 750   | 579   | 829   | 552   | 1388  | 3707   | 4098   |
| P13726   | Tissue factor                                              | TF       | 7   | 0.91 | 0.83963 | 123   | 440   | 490   | 606   | 585   | 445   | 442   | 771   | 705   | 112   | 2245   | 2475   |
| P08575   | Receptor-type tyrosine-protein phosphatase C               | PTPRC    | 27  | 0.91 | 0.88116 | 5756  | 2098  | 4379  | 1804  | 1446  | 3398  | 2194  | 1902  | 2210  | 7347  | 15482  | 17051  |
| Q724W1   | L-xylulose reductase                                       | DXR      | 2   | 0.91 | 0.46112 | 84    | 71    | 71    | 77    | 85    | 97    | 83    | 104   | 73    | 69    | 388    | 426    |
| P17931   | Galectin-3                                                 | LGALS3   | 10  | 0.92 | 0.69065 | 1230  | 1754  | 1178  | 1131  | 1139  | 1200  | 1038  | 1265  | 1725  | 1767  | 6432   | 6995   |
| Q8N370-3 | Isoform 3 of Large neutral amino acids transporter         | SLC3A2   | 11  | 0.93 | 0.77842 | 2545  | 2505  | 2532  | 1130  | 2066  | 2311  | 1582  | 2109  | 2344  | 3267  | 10777  | 11613  |
| P53396   | ATP-citrate synthase                                       | ACLY     | 10  | 0.95 | 0.79915 | 508   | 465   | 508   | 734   | 919   | 726   | 671   | 614   | 628   | 676   | 3135   | 3315   |
| P01857   | Ig gamma-1 chain C region                                  | IGHG1    | 4   | 0.95 | 0.82440 | 358   | 285   | 332   | 317   | 281   | 481   | 301   | 249   | 264   | 356   | 1572   | 1652   |
| P05362   | Intercellular adhesion molecule 1                          | ICAM1    | 11  | 0.95 | 0.89074 | 372   | 1069  | 1165  | 698   | 775   | 838   | 803   | 1163  | 974   | 496   | 4080   | 4274   |
| Q9UIW2   | Plexin-A1                                                  | PLXNA1   | 19  | 0.96 | 0.77037 | 1194  | 1497  | 1653  | 1807  | 1549  | 1973  | 1691  | 1428  | 1360  | 1585  | 7701   | 8037   |
| P49368   | T-complex protein 1 subunit gamma                          | CTC3     | 10  | 0.96 | 0.84882 | 682   | 625   | 859   | 592   | 701   | 654   | 551   | 844   | 600   | 774   | 3290   | 3423   |
| P30043   | Flavin reductase (NADPH)                                   | BLVRB    | 6   | 0.96 | 0.84882 | 1064  | 764   | 1182  | 1540  | 1460  | 1167  | 1094  | 1046  | 1467  | 1476  | 6009   | 6250   |
| P02730   | Band 3 anion transport protein                             | SLC4A1   | 619 | 0.97 | 0.62386 | 78261 | 85840 | 83090 | 83901 | 95472 | 89448 | 89544 | 82929 | 89078 | 81221 | 426564 | 441101 |
| Q9Y6M5   | Zinc transporter 1                                         | SLC30A1  | 26  | 0.98 | 0.90095 | 6080  | 4428  | 3917  | 4361  | 3732  | 4002  | 4101  | 5214  | 4844  | 4835  | 22519  | 22996  |
| P49281-3 | Isoform 3 of Natural resistance-associated macrophage      | SLC11A2  | 5   | 0.98 | 0.95279 | 328   | 601   | 329   | 563   | 346   | 443   | 329   | 706   | 506   | 227   | 2166   | 2212   |
| Q12913   | Receptor-type tyrosine-protein phosphatase eta             | PTPREG   | 4   | 0.98 | 0.94202 | 132   | 274   | 296   | 327   | 328   | 324   | 307   | 323   | 270   | 161   | 1358   | 1385   |
| P05026   | Sodium/potassium-transporting ATPase subunit beta          | ATP1B1   | 25  | 0.98 | 0.93796 | 1969  | 4147  | 4055  | 3951  | 4097  | 4327  | 4453  | 4311  | 2465  | 2486  | 18671  | 19041  |
| P11277-2 | Isoform 2 of Spectrin beta chain, erythrocytic             | SPTB     | 3   | 0.99 | 0.94202 | 170   | 152   | 164   | 220   | 183   | 166   | 200   | 163   | 132   | 239   | 889    | 901    |
| P51790   | H(+)/Cl(-) exchange transporter 3                          | CLCN3    | 8   | 0.99 | 0.96675 | 656   | 504   | 450   | 474   | 319   | 326   | 424   | 759   | 581   | 341   | 2403   | 2431   |
| P14672   | Solute carrier family 2, facilitated glucose transport     | SLC22A4  | 3   | 0.99 | 0.94526 | 277   | 335   | 367   | 377   | 313   | 262   | 312   | 404   | 326   | 382   | 1669   | 1685   |
| P0C0L4   | Complement C4-A                                            | C4A      | 18  | 0.99 | 0.99603 | 1407  | 1423  | 2019  | 1680  | 2724  | 8782  | 816   | 1154  | 1452  | 1712  | 13802  | 13914  |
| Q9NV96   | Cell cycle control protein 50A                             | TMEM30A  | 13  | 0.99 | 0.96675 | 1614  | 1828  | 1707  | 1546  | 1305  | 1267  | 1748  | 1667  | 1910  | 1451  | 8000   | 8042   |
| A1A5C7   | Solute carrier family 22 member 23                         | SLC22A23 | 18  | 1.00 | 0.99603 | 2794  | 2277  | 2519  | 2401  | 1587  | 1872  | 2040  | 1887  | 2580  | 3209  | 11579  | 11587  |
| P08581   | Hepatocyte growth factor receptor                          | MET      | 5   | 1.00 | 0.99603 | 724   | 655   | 717   | 760   | 741   | 850   | 830   | 635   | 633   | 650   | 3597   | 3600   |
| Q8IWA5   | Choline transporter-like protein 2                         | SLC44A2  | 8   | 1.01 | 0.95417 | 839   | 1120  | 989   | 867   | 842   | 612   | 765   | 1083  | 1000  | 1150  | 4657   | 4610   |
| Q8N849   | Probable phospholipid-transporting ATPase IG               | ATP11C   | 4   | 1.01 | 0.93333 | 603   | 680   | 653   | 717   | 611   | 557   | 811   | 684   | 705   | 461   | 3263   | 3218   |
| P07900-2 | Isoform 2 of Heat shock protein HSP 90-alpha               | HSP90AA1 | 11  | 1.02 | 0.93364 | 708   | 684   | 966   | 886   | 911   | 902   | 824   | 624   | 674   | 1066  | 4156   | 4089   |
| P62834   | Ras-related protein Rap-1A                                 | RAP1A    | 11  | 1.02 | 0.86550 | 1075  | 1333  | 1202  | 926   | 1092  | 913   | 1220  | 1063  | 1260  | 1059  | 5629   | 5508   |
| P25445   | Tumor necrosis factor receptor superfamily member FAS      | FAS      | 7   | 1.03 | 0.91617 | 2594  | 4023  | 3232  | 2215  | 1785  | 2525  | 2152  | 2584  | 2036  | 4089  | 13849  | 13386  |
| Q92541-2 | Isoform 2 of Sodium/hydrogen exchanger 6                   | SLC9A6   | 3   | 1.04 | 0.84882 | 275   | 223   | 178   | 203   | 158   | 152   | 195   | 215   | 230   | 210   | 1038   | 1003   |
| P06733   | Alpha-enolase                                              | ENO1     | 8   | 1.05 | 0.69674 | 662   | 483   | 631   | 591   | 701   | 470   | 642   | 556   | 580   | 671   | 3067   | 2919   |
| P43007   | Neutral amino acid transporter A                           | SLC1A4   | 2   | 1.05 | 0.82325 | 206   | 195   | 145   | 305   | 231   | 169   | 227   | 215   | 244   | 170   | 1082   | 1026   |
| P28907   | ADP-ribosyl cyclase 1                                      | CD38     | 16  | 1.05 | 0.74821 | 1557  | 1491  | 1423  | 1013  | 1166  | 1289  | 1043  | 1448  | 1051  | 1476  | 6651   | 6308   |
| Q5T3F8   | Transmembrane protein 63B                                  | TMEM63B  | 7   | 1.06 | 0.81143 | 925   | 781   | 641   | 659   | 450   | 574   | 592   | 815   | 377   | 557   | 3456   | 3275   |
| P24666   | Low molecular weight phosphotyrosine protein phosphatase   | PTP4A1   | 8   | 1.07 | 0.60949 | 1340  | 1377  | 1040  | 984   | 987   | 925   | 1180  | 985   | 1188  | 1071  | 5728   | 5349   |
| Q7KVR7   | Butyrophilin subfamily 2 member A1                         | BTN2A1   | 4   | 1.08 | 0.66151 | 398   | 440   | 326   | 342   | 522   | 456   | 416   | 368   | 376   | 257   | 2028   | 1873   |
| Q9UN00   | ATP-binding cassette sub-family G member 2                 | ABCG2    | 10  | 1.09 | 0.82440 | 732   | 932   | 1585  | 1523  | 2409  | 1714  | 1029  | 1296  | 1143  | 1435  | 7182   | 6617   |
| P0C0L5   | Complement C4-B                                            | C4B      | 4   | 1.09 | 0.92642 | 108   | 106   | 227   | 102   | 440   | 482   | 72    | 98    | 111   | 142   | 983    | 905    |
| Q16563   | Synaptophysin-like protein 1                               | SVPL1    | 6   | 1.09 | 0.75414 | 1026  | 1359  | 625   | 735   | 574   | 749   | 981   | 758   | 769   | 690   | 4319   | 3947   |
| Q9Y551   | Transient receptor potential cation channel subunit TRPV2  | TRPV2    | 2   | 1.09 | 0.70360 | 243   | 163   | 137   | 118   | 150   | 116   | 177   | 130   | 142   | 176   | 811    | 741    |
| P18577   | Blood group Rh(C) polypeptide                              | RHCE     | 10  | 1.11 | 0.28203 | 1399  | 1329  | 1531  | 1649  | 1410  | 1212  | 1331  | 1093  | 1450  | 1501  | 7318   | 6587   |
| Q92508   | Piezo-type mechanosensitive ion channel component 1        | PIEZO1   | 41  | 1.12 | 0.50420 | 5043  | 4314  | 3720  | 6073  | 5801  | 3942  | 4477  | 4817  | 5822  | 5525  | 24951  | 22344  |
| Q9NZW5   | MAGUK p55 subfamily member 6                               | MPPE6    | 2   | 1.12 | 0.59094 | 140   | 213   | 137   | 125   | 122   | 109   | 118   | 173   | 132   | 128   | 737    | 660    |
| Q15440   | Multidrug resistance-associated protein 5                  | ABCC5    | 21  | 1.12 | 0.52161 | 2927  | 2794  | 1809  | 2250  | 1968  | 1550  | 2573  | 2306  | 2224  | 1814  | 11748  | 10467  |
| P04156   | Major prion protein                                        | PRNP     | 2   | 1.12 | 0.47230 | 122   | 182   | 193   | 142   | 126   | 120   | 135   | 150   | 159   | 117   | 764    | 680    |
| Q92542   | Nicastrin                                                  | NCSTN    | 4   | 1.13 | 0.40920 | 355   | 419   | 307   | 349   | 257   | 291   | 241   | 291   | 344   | 329   | 1687   | 1497   |
| P29972   | Aquaporin-1                                                | AQP1     | 3   | 1.13 | 0.46347 | 1349  | 1055  | 1011  | 1026  | 1108  | 810   | 900   | 784   | 1037  | 1376  | 5549   | 4907   |
| Q15223   | Poliovirus receptor-related protein 1                      | PVR1     | 18  | 1.13 | 0.49200 | 2876  | 3636  | 2337  | 2977  | 2241  | 2018  | 2000  | 2717  | 2440  | 3238  | 14067  | 12414  |

|          |                                                            |    |      |         |       |       |      |       |      |      |      |      |      |      |       |       |
|----------|------------------------------------------------------------|----|------|---------|-------|-------|------|-------|------|------|------|------|------|------|-------|-------|
| O15554   | Intermediate conductance calcium-activated potas: KCNN4    | 9  | 1.35 | 0.01793 | 1582  | 1479  | 1287 | 1565  | 1543 | 1164 | 962  | 1065 | 1030 | 1296 | 7457  | 5517  |
| P08174-7 | Isoform 7 of Complement decay-accelerating factor CD55     | 42 | 1.36 | 0.25786 | 10854 | 12950 | 8046 | 7721  | 5577 | 4035 | 7066 | 6949 | 7809 | 7436 | 45147 | 33296 |
| P41440   | Folate transporter 1                                       | 3  | 1.36 | 0.10395 | 228   | 235   | 158  | 264   | 224  | 141  | 181  | 135  | 170  | 187  | 1109  | 814   |
| P61225   | Ras-related protein Rap-2b                                 | 6  | 1.37 | 0.11166 | 714   | 681   | 670  | 487   | 586  | 378  | 426  | 390  | 444  | 659  | 3138  | 2296  |
| P33527-9 | Isoform 9 of Multidrug resistance-associated protein ABCB1 | 30 | 1.39 | 0.08166 | 3705  | 3902  | 4408 | 5226  | 4861 | 3291 | 3987 | 3315 | 2845 | 2407 | 22102 | 15845 |
| P20020   | Plasma membrane calcium-transporting ATPase 1              | 11 | 1.41 | 0.04468 | 1120  | 1091  | 991  | 1463  | 1080 | 730  | 825  | 782  | 878  | 851  | 5745  | 4066  |
| P16671   | Platelet glycoprotein 4                                    | 5  | 1.43 | 0.15618 | 451   | 535   | 317  | 427   | 256  | 251  | 256  | 239  | 278  | 367  | 1986  | 1391  |
| P04971   | Glycophorin-C                                              | 67 | 1.48 | 0.04598 | 4972  | 4537  | 3855 | 3836  | 3502 | 2402 | 2590 | 2444 | 2933 | 3624 | 20702 | 13993 |
| O60486   | Plexin-C1                                                  | 3  | 1.49 | 0.32110 | 445   | 773   | 510  | 335   | 514  | 5    | 308  | 518  | 354  | 542  | 2576  | 1728  |
| Q99808   | Equilibrative nucleoside transporter 1                     | 35 | 1.49 | 0.10395 | 3991  | 5306  | 4274 | 4763  | 3429 | 2138 | 2271 | 2771 | 2857 | 4536 | 21763 | 14573 |
| Q01973   | Tyrosine-protein kinase transmembrane receptor ROR1        | 3  | 1.53 | 0.31419 | 68    | 341   | 313  | 455   | 453  | 226  | 190  | 288  | 268  | 90   | 1630  | 1062  |
| P23276   | Kell blood group glycoprotein                              | 41 | 1.56 | 0.10395 | 4700  | 4961  | 4266 | 4706  | 3959 | 3770 | 754  | 3495 | 3577 | 2903 | 22592 | 14499 |
| P22303-2 | Isoform H of Acetylcholinesterase                          | 20 | 1.58 | 0.09243 | 3629  | 3736  | 2769 | 3414  | 2023 | 1377 | 2149 | 1769 | 2015 | 2549 | 15571 | 9859  |
| Q08174-2 | Isoform 2 of Protocadherin-1                               | 4  | 1.59 | 0.43562 | 555   | 381   | 312  | 265   | 230  | 114  | 115  | 115  | 122  | 628  | 1743  | 1094  |
| P51811   | Membrane transport protein XK                              | 10 | 1.61 | 0.10395 | 1691  | 1615  | 1353 | 1828  | 1227 | 1297 | 243  | 1209 | 1081 | 976  | 7714  | 4805  |
| Q75387   | Large neutral amino acids transporter small subunit        | 7  | 1.62 | 0.12599 | 387   | 1004  | 1015 | 1059  | 743  | 448  | 492  | 539  | 459  | 665  | 4208  | 2603  |
| Q8WJ01   | Ras-related protein Rab-2B                                 | 2  | 1.66 | 0.01674 | 281   | 321   | 324  | 357   | 286  | 163  | 178  | 257  | 203  | 146  | 1569  | 948   |
| P02760   | Protein AMBP                                               | 4  | 1.66 | 0.13816 | 431   | 387   | 444  | 530   | 391  | 187  | 200  | 188  | 197  | 541  | 2184  | 1313  |
| P51148-2 | Isoform 2 of Ras-related protein Rab-5C                    | 4  | 1.68 | 0.01228 | 309   | 369   | 380  | 358   | 371  | 234  | 210  | 283  | 191  | 148  | 1787  | 1066  |
| P00568   | Adenylate kinase isoenzyme 1                               | 4  | 1.85 | 0.10395 | 318   | 189   | 319  | 527   | 485  | 205  | 182  | 194  | 219  | 192  | 1837  | 991   |
| Q00013   | 55 kDa erythrocyte membrane protein                        | 22 | 1.87 | 0.00019 | 3626  | 3425  | 3549 | 4213  | 3504 | 1961 | 1960 | 2007 | 1926 | 1939 | 18317 | 9793  |
| Q13336-2 | Isoform 2 of Urea transporter 1                            | 10 | 1.91 | 0.11504 | 1865  | 1419  | 1772 | 1556  | 1634 | 1174 | 1282 | 48   | 47   | 1765 | 8246  | 4316  |
| Q15162   | Phospholipid scramblase 1                                  | 2  | 1.92 | 0.10395 | 182   | 198   | 209  | 412   | 297  | 154  | 124  | 136  | 118  | 143  | 1298  | 675   |
| P61106   | Ras-related protein Rab-14                                 | 2  | 1.95 | 0.00215 | 442   | 428   | 499  | 558   | 461  | 228  | 240  | 286  | 276  | 194  | 2388  | 1224  |
| P17927   | Complement receptor type 1                                 | 37 | 1.98 | 0.08864 | 6752  | 7894  | 5455 | 10091 | 4884 | 1764 | 3453 | 3903 | 3079 | 5494 | 35076 | 17694 |
| P60953   | Cell division control protein 42 homolog                   | 2  | 2.05 | 0.04598 | 250   | 169   | 272  | 333   | 380  | 130  | 166  | 142  | 125  | 123  | 1404  | 686   |
| Q75695   | Protein XRP2                                               | 2  | 2.09 | 0.13999 | 162   | 167   | 183  | 429   | 209  | 92   | 100  | 100  | 151  | 107  | 1150  | 550   |
| P50895   | Basal cell adhesion molecule                               | 39 | 2.24 | 0.10395 | 8458  | 9444  | 8912 | 4477  | 3775 | 3536 | 1179 | 3046 | 2073 | 5799 | 35066 | 15633 |
| Q9NRQ2   | Phospholipid scramblase 4                                  | 3  | 2.50 | 0.10395 | 197   | 180   | 179  | 489   | 297  | 113  | 112  | 87   | 88   | 138  | 1343  | 538   |
| Q81F2    | Probable G-protein coupled receptor 116                    | 4  | 2.55 | 0.22930 | 130   | 1956  | 2168 | 872   | 1028 | 260  | 241  | 943  | 853  | 120  | 6153  | 2417  |
| P01008   | Antithrombin-III                                           | 3  | 2.59 | 0.09559 | 130   | 226   | 190  | 161   | 236  | 97   | 24   | 24   | 26   | 193  | 943   | 364   |
| Q75326   | Semaphorin-7A                                              | 15 | 2.65 | 0.10395 | 2554  | 3064  | 1546 | 1678  | 889  | 161  | 333  | 891  | 1025 | 1265 | 9730  | 3674  |
| Q9NG59   | Solute carrier family 40 member 1                          | 45 | 2.83 | 0.01359 | 8480  | 11959 | 9301 | 9327  | 7992 | 5129 | 1280 | 1993 | 2528 | 5723 | 47059 | 16653 |
| P0C648   | Polyubiquitin-C                                            | 14 | 2.84 | 0.00298 | 2604  | 1753  | 1866 | 2264  | 2694 | 664  | 1017 | 652  | 787  | 820  | 11182 | 3939  |
| O00421-2 | Isoform 2 of C-C chemokine receptor-like 2                 | 6  | 2.93 | 0.05447 | 592   | 1025  | 1051 | 700   | 705  | 209  | 191  | 135  | 127  | 729  | 4072  | 1392  |
| P14209   | CD99 antigen                                               | 5  | 5.50 | 0.02391 | 1612  | 474   | 1025 | 1500  | 1264 | 412  | 116  | 160  | 114  | 266  | 5876  | 1068  |

Supplementary Table 2: ABC86 coding region or splice variants enriched in geographic regions with low (A) or high (B) malaria exposure as percent of population, from the ExAC database

| A)               |      | p.Ile797Val p.Val780Ile p.Val772Phe p.Arg739Cys p.Gly730Arg c.106-5G>A p.Ala681Thr c.1863+8G>C p.Tyr599Cys p.Gly588Ser p.Ala492Thr p.Val454Ala p.Arg365His p.Arg276Gln <sup>‡</sup> p.Arg276Trp p.Arg247Cys p.Glu220Val p.Arg192Gln p.Arg192Trp <sup>‡</sup>                                                                                                                                                                                  |      |                         |      |                                    |      |                        |      |                                                 |      |                    |      |                        |      |                    |      |                    |      |                 |      |                    |      |                 |      |                    |      |                    |      |                   |      |                    |      |                    |      |                    |   |                 |  |                 |  |                    |  |                 |  |                    |  |                 |  |                 |  |                 |  |                 |  |                    |  |                 |  |                    |  |                    |  |                    |  |                    |  |
|------------------|------|-----------------------------------------------------------------------------------------------------------------------------------------------------------------------------------------------------------------------------------------------------------------------------------------------------------------------------------------------------------------------------------------------------------------------------------------------|------|-------------------------|------|------------------------------------|------|------------------------|------|-------------------------------------------------|------|--------------------|------|------------------------|------|--------------------|------|--------------------|------|-----------------|------|--------------------|------|-----------------|------|--------------------|------|--------------------|------|-------------------|------|--------------------|------|--------------------|------|--------------------|---|-----------------|--|-----------------|--|--------------------|--|-----------------|--|--------------------|--|-----------------|--|-----------------|--|-----------------|--|-----------------|--|--------------------|--|-----------------|--|--------------------|--|--------------------|--|--------------------|--|--------------------|--|
| rs <sup>‡</sup>  |      | rs141840760 rs146941118                                                                                                                                                                                                                                                                                                                                                                                                                       |      | rs14242126              |      | rs145526996 rs147445258 rs15733629 |      | rs200125320 rs17467915 |      | rs190528998 rs142256852 rs150221689 rs149202834 |      |                    |      |                        |      |                    |      |                    |      |                 |      |                    |      |                 |      |                    |      |                    |      |                   |      |                    |      |                    |      |                    |   |                 |  |                 |  |                    |  |                 |  |                    |  |                 |  |                 |  |                 |  |                 |  |                    |  |                 |  |                    |  |                    |  |                    |  |                    |  |
| Predicted Effect |      | missense                                                                                                                                                                                                                                                                                                                                                                                                                                      |      | missense                |      | splice region                      |      | missense               |      | missense                                        |      | missense           |      | missense               |      | missense           |      | missense           |      | missense        |      | missense           |      |                 |      |                    |      |                    |      |                   |      |                    |      |                    |      |                    |   |                 |  |                 |  |                    |  |                 |  |                    |  |                 |  |                 |  |                 |  |                 |  |                    |  |                 |  |                    |  |                    |  |                    |  |                    |  |
| Pop <sup>§</sup> |      |                                                                                                                                                                                                                                                                                                                                                                                                                                               |      |                         |      |                                    |      |                        |      |                                                 |      |                    |      |                        |      |                    |      |                    |      |                 |      |                    |      |                 |      |                    |      |                    |      |                   |      |                    |      |                    |      |                    |   |                 |  |                 |  |                    |  |                 |  |                    |  |                 |  |                 |  |                 |  |                 |  |                    |  |                 |  |                    |  |                    |  |                    |  |                    |  |
| Exp <sup>¶</sup> |      |                                                                                                                                                                                                                                                                                                                                                                                                                                               |      |                         |      |                                    |      |                        |      |                                                 |      |                    |      |                        |      |                    |      |                    |      |                 |      |                    |      |                 |      |                    |      |                    |      |                   |      |                    |      |                    |      |                    |   |                 |  |                 |  |                    |  |                 |  |                    |  |                 |  |                 |  |                 |  |                 |  |                    |  |                 |  |                    |  |                    |  |                    |  |                    |  |
| Afr              | high | 0                                                                                                                                                                                                                                                                                                                                                                                                                                             | 0    | 0                       | 0    | 0                                  | 0    | 0                      | 0    | 0.14                                            | 0.19 | 0.04               | 0    | 0                      | 0.39 | 0                  | 0    | 0.05               | 0.01 |                 |      |                    |      |                 |      |                    |      |                    |      |                   |      |                    |      |                    |      |                    |   |                 |  |                 |  |                    |  |                 |  |                    |  |                 |  |                 |  |                 |  |                 |  |                    |  |                 |  |                    |  |                    |  |                    |  |                    |  |
| S.A.             | high | 0                                                                                                                                                                                                                                                                                                                                                                                                                                             | 0.01 | 0                       | 0.01 | 0.01                               | 0.02 | 0.01                   | 0.33 | 0                                               | 0.1  | 0.02               | 0.01 | 0                      | 0.01 | 0.38               | 0    | 0                  | 0.07 | 0.04            |      |                    |      |                 |      |                    |      |                    |      |                   |      |                    |      |                    |      |                    |   |                 |  |                 |  |                    |  |                 |  |                    |  |                 |  |                 |  |                 |  |                 |  |                    |  |                 |  |                    |  |                    |  |                    |  |                    |  |
| E.A.             | low  | 0.23                                                                                                                                                                                                                                                                                                                                                                                                                                          | 0    | 0                       | 0    | 0                                  | 0.5  | 0                      | 0    | 0.28                                            | 0    | 0                  | 0.05 | 0                      | 0    | 0.07               | 0    | 0                  | 0    | 0               |      |                    |      |                 |      |                    |      |                    |      |                   |      |                    |      |                    |      |                    |   |                 |  |                 |  |                    |  |                 |  |                    |  |                 |  |                 |  |                 |  |                 |  |                    |  |                 |  |                    |  |                    |  |                    |  |                    |  |
| Fin              | low  | 0                                                                                                                                                                                                                                                                                                                                                                                                                                             | 0    | 0                       | 0    | 0                                  | 0    | 0.06                   | 0    | 0                                               | 0.39 | 0.97               | 0    | 0                      | 0.45 | 6.53               | 0    | 0.03               | 0.15 | 0.18            |      |                    |      |                 |      |                    |      |                    |      |                   |      |                    |      |                    |      |                    |   |                 |  |                 |  |                    |  |                 |  |                    |  |                 |  |                 |  |                 |  |                 |  |                    |  |                 |  |                    |  |                    |  |                    |  |                    |  |
| Euro             | low  | 0                                                                                                                                                                                                                                                                                                                                                                                                                                             | 0.06 | 0.02                    | 0.05 | 0.01                               | 0.01 | 0.04                   | 0.02 | 0                                               | 0.71 | 0.96               | 0    | 0.02                   | 0.1  | 2.96               | 0.01 | 0.02               | 0.51 | 0.3             |      |                    |      |                 |      |                    |      |                    |      |                   |      |                    |      |                    |      |                    |   |                 |  |                 |  |                    |  |                 |  |                    |  |                 |  |                 |  |                 |  |                 |  |                    |  |                 |  |                    |  |                    |  |                    |  |                    |  |
| Lat              | low  | 0                                                                                                                                                                                                                                                                                                                                                                                                                                             | 0.03 | 0                       | 0.08 | 0.15                               | 0.01 | 0                      | 0    | 0.28                                            | 1.56 | 4.69               | 0.16 | 0                      | 1.95 | 6.5                | 0    | 0.4                | 0.04 |                 |      |                    |      |                 |      |                    |      |                    |      |                   |      |                    |      |                    |      |                    |   |                 |  |                 |  |                    |  |                 |  |                    |  |                 |  |                 |  |                 |  |                 |  |                    |  |                 |  |                    |  |                    |  |                    |  |                    |  |
| <b>P-value**</b> |      | <b>0.012426696</b>                                                                                                                                                                                                                                                                                                                                                                                                                            |      | <b>0.00015518</b>       |      | <b>0.01135135</b>                  |      | <b>0.000985064</b>     |      | <b>0.018310047</b>                              |      | <b>0.003373824</b> |      | <b>0.004994011</b>     |      | <b>6.95E-25</b>    |      | <b>0.005011035</b> |      | <b>3.54E-28</b> |      | <b>1.31E-61</b>    |      | <b>1.42E-52</b> |      | <b>0.002800279</b> |      | <b>0.000507627</b> |      | <b>1.69E-48</b>   |      | <b>1.24E-67</b>    |      | <b>0.019287316</b> |      | <b>6.51E-26</b>    |   | <b>6.08E-17</b> |  |                 |  |                    |  |                 |  |                    |  |                 |  |                 |  |                 |  |                 |  |                    |  |                 |  |                    |  |                    |  |                    |  |                    |  |
| B)               |      |                                                                                                                                                                                                                                                                                                                                                                                                                                               |      |                         |      |                                    |      |                        |      |                                                 |      |                    |      |                        |      |                    |      |                    |      |                 |      |                    |      |                 |      |                    |      |                    |      |                   |      |                    |      |                    |      |                    |   |                 |  |                 |  |                    |  |                 |  |                    |  |                 |  |                 |  |                 |  |                 |  |                    |  |                 |  |                    |  |                    |  |                    |  |                    |  |
| ADA*             |      | p.Trp778Ile p.Gly715Glu p.Arg65His p.Arg68Cys p.Arg682Asn p.Asn677Asp p.Ala660Val p.Ala660Asp p.Arg648Gln <sup>‡</sup> c.1579-7G>A c.1578-5G>C p.Trp721Ser p.Gly512Ser p.Ala511Thr p.Gln499Leu p.Val495Leu p.Arg475Cys p.Ser470Asn p.Glu469Gln p.Leu421Val c.1154+2T>C p.Arg371Gln p.Glu355Cys p.Phe332Leu p.Val306Ile p.Leu302Val p.Arg231Gln p.Ala164Thr p.Ala57Thr p.Phe236Ile <sup>‡</sup> p.Pro13Leu p.Cys85Ser <sup>‡</sup> Trp.Val2Met |      |                         |      |                                    |      |                        |      |                                                 |      |                    |      |                        |      |                    |      |                    |      |                 |      |                    |      |                 |      |                    |      |                    |      |                   |      |                    |      |                    |      |                    |   |                 |  |                 |  |                    |  |                 |  |                    |  |                 |  |                 |  |                 |  |                 |  |                    |  |                 |  |                    |  |                    |  |                    |  |                    |  |
| rs <sup>‡</sup>  |      | rs143621292                                                                                                                                                                                                                                                                                                                                                                                                                                   |      | rs139523062 rs144295428 |      | rs140239756 rs1402964              |      | rs149363094            |      | rs140089441                                     |      | rs140244896        |      | rs11677240 rs111852229 |      | rs138422826        |      | rs113199519        |      | rs143052685     |      |                    |      |                 |      |                    |      |                    |      |                   |      |                    |      |                    |      |                    |   |                 |  |                 |  |                    |  |                 |  |                    |  |                 |  |                 |  |                 |  |                 |  |                    |  |                 |  |                    |  |                    |  |                    |  |                    |  |
| Predicted Effect |      | missense                                                                                                                                                                                                                                                                                                                                                                                                                                      |      | missense                |      | missense                           |      | missense               |      | missense                                        |      | missense           |      | missense               |      | missense           |      | missense           |      | missense        |      | missense           |      | missense        |      | missense           |      | missense           |      | missense          |      | missense           |      | missense           |      | missense           |   |                 |  |                 |  |                    |  |                 |  |                    |  |                 |  |                 |  |                 |  |                 |  |                    |  |                 |  |                    |  |                    |  |                    |  |                    |  |
| Pop <sup>§</sup> |      |                                                                                                                                                                                                                                                                                                                                                                                                                                               |      |                         |      |                                    |      |                        |      |                                                 |      |                    |      |                        |      |                    |      |                    |      |                 |      |                    |      |                 |      |                    |      |                    |      |                   |      |                    |      |                    |      |                    |   |                 |  |                 |  |                    |  |                 |  |                    |  |                 |  |                 |  |                 |  |                 |  |                    |  |                 |  |                    |  |                    |  |                    |  |                    |  |
| Exp <sup>¶</sup> |      |                                                                                                                                                                                                                                                                                                                                                                                                                                               |      |                         |      |                                    |      |                        |      |                                                 |      |                    |      |                        |      |                    |      |                    |      |                 |      |                    |      |                 |      |                    |      |                    |      |                   |      |                    |      |                    |      |                    |   |                 |  |                 |  |                    |  |                 |  |                    |  |                 |  |                 |  |                 |  |                 |  |                    |  |                 |  |                    |  |                    |  |                    |  |                    |  |
| Afr              | high | 0.1                                                                                                                                                                                                                                                                                                                                                                                                                                           | 0    | 0                       | 0.13 | 0.03                               | 0    | 0.03                   | 0.04 | 0.64                                            | 0    | 0.05               | 1.54 | 0.01                   | 0.16 | 0.04               | 0    | 0.04               | 0    | 0               | 0.44 | 0                  | 0    | 0.06            | 0.17 | 0                  | 0.11 | 0                  | 0    | 0.13              | 0    | 0                  | 0    | 0                  | 0.04 |                    |   |                 |  |                 |  |                    |  |                 |  |                    |  |                 |  |                 |  |                 |  |                 |  |                    |  |                 |  |                    |  |                    |  |                    |  |                    |  |
| S.A.             | high | 0                                                                                                                                                                                                                                                                                                                                                                                                                                             | 0.02 | 0.02                    | 0    | 0.01                               | 0.05 | 0                      | 0    | 0                                               | 0.1  | 0                  | 0.12 | 0.01                   | 0.01 | 0                  | 0.04 | 0                  | 0.02 | 0.04            | 0.01 | 0.04               | 0.14 | 0               | 0    | 0.26               | 0    | 0.05               | 0    | 0.08              | 0.03 | 0.02               | 0.02 | 0                  | 0    |                    |   |                 |  |                 |  |                    |  |                 |  |                    |  |                 |  |                 |  |                 |  |                 |  |                    |  |                 |  |                    |  |                    |  |                    |  |                    |  |
| E.A.             | low  | 0                                                                                                                                                                                                                                                                                                                                                                                                                                             | 0    | 0.02                    | 0    | 0                                  | 0    | 0                      | 0    | 0.01                                            | 0    | 0                  | 0    | 0                      | 0    | 0                  | 0.01 | 0                  | 0    | 0               | 0    | 0                  | 0    | 0               | 0    | 0                  | 0    | 0                  | 0    | 0.02              | 0    | 0                  | 0    | 0                  | 0    |                    |   |                 |  |                 |  |                    |  |                 |  |                    |  |                 |  |                 |  |                 |  |                 |  |                    |  |                 |  |                    |  |                    |  |                    |  |                    |  |
| Fin              | low  | 0                                                                                                                                                                                                                                                                                                                                                                                                                                             | 0    | 0                       | 0    | 0                                  | 0    | 0                      | 0    | 0                                               | 0    | 0                  | 0.05 | 0                      | 0    | 0                  | 0    | 0                  | 0    | 0               | 0    | 0                  | 0    | 0               | 0    | 0                  | 0    | 0                  | 0    | 0                 | 0    | 0                  | 0    | 0                  | 0    | 0                  |   |                 |  |                 |  |                    |  |                 |  |                    |  |                 |  |                 |  |                 |  |                 |  |                    |  |                 |  |                    |  |                    |  |                    |  |                    |  |
| Euro             | low  | 0                                                                                                                                                                                                                                                                                                                                                                                                                                             | 0    | 0                       | 0    | 0                                  | 0    | 0                      | 0    | 0.01                                            | 0.01 | 0                  | 0.38 | 0                      | 0    | 0                  | 0    | 0                  | 0    | 0               | 0    | 0                  | 0    | 0               | 0.01 | 0                  | 0    | 0                  | 0.01 | 0                 | 0    | 0.01               | 0    | 0                  | 0    | 0                  | 0 |                 |  |                 |  |                    |  |                 |  |                    |  |                 |  |                 |  |                 |  |                 |  |                    |  |                 |  |                    |  |                    |  |                    |  |                    |  |
| Lat              | low  | 0                                                                                                                                                                                                                                                                                                                                                                                                                                             | 0    | 0                       | 0.03 | 0                                  | 0    | 0                      | 0    | 0.05                                            | 0.05 | 0                  | 0.28 | 0                      | 0    | 0                  | 0.01 | 0.01               | 0    | 0               | 0.03 | 0                  | 0    | 0               | 0.02 | 0                  | 0.01 | 0                  | 0.04 | 0.01              | 0    | 0.04               | 0.01 | 0                  | 0.01 | 0                  | 0 |                 |  |                 |  |                    |  |                 |  |                    |  |                 |  |                 |  |                 |  |                 |  |                    |  |                 |  |                    |  |                    |  |                    |  |                    |  |
| <b>P-value**</b> |      | <b>3.10E-07</b>                                                                                                                                                                                                                                                                                                                                                                                                                               |      | <b>0.01122114</b>       |      | <b>0.02526153</b>                  |      | <b>9.28E-06</b>        |      | <b>0.010227726</b>                              |      | <b>6.19E-06</b>    |      | <b>0.01134939</b>      |      | <b>0.002486329</b> |      | <b>1.31E-30</b>    |      | <b>8.45E-05</b> |      | <b>0.000518769</b> |      | <b>7.63E-14</b> |      | <b>0.035997645</b> |      | <b>7.67E-10</b>    |      | <b>0.00241762</b> |      | <b>0.000676604</b> |      | <b>0.048561577</b> |      | <b>0.011148228</b> |   | <b>2.78E-05</b> |  | <b>2.44E-26</b> |  | <b>0.004688397</b> |  | <b>9.16E-09</b> |  | <b>0.018214486</b> |  | <b>9.74E-07</b> |  | <b>3.73E-27</b> |  | <b>6.74E-07</b> |  | <b>8.38E-05</b> |  | <b>0.001154926</b> |  | <b>4.64E-07</b> |  | <b>0.030898784</b> |  | <b>0.040922948</b> |  | <b>0.037774826</b> |  | <b>0.006369975</b> |  |

\*. Amino acid change and location  
 ‡. Reference SNP (cluster ID (NCBI))  
 §. Populations: Africans; S.A., South Asians; E.A., East Asians; Fin, Finnish; Euro, non-Finnish Europeans; Lat, Latinos  
 ¶. Exposure of current or ancestral population to malaria based on World Health Organization DALY  
 †. Variant previously reported for lam-null blood type  
 \*\*. Fisher's exact test comparing populations binned for high or low malaria exposure.
